# Supplementary material for: Influence of solvent effect, temperature, and pressure on the aggregation behavior of island model asphaltene: a molecular dynamics study
Source: Royal Society of Chemistry journal article supplement (doi:10.1039/d6ra00135a), 2026-05-12
Supplement: d6ra00135a1.pdf [file d6ra00135a1.pdf]

1 **Supplementary Information**

2

3 **Influence of Solvent Effect, Temperature, and**  
4 **Pressure on the Aggregation Behavior of Island Model**  
5 **Asphaltene: A Molecular Dynamics Study**

6

7 Cun Hu <sup>a,b,c\*</sup>, Dandan Hong <sup>a,b,c</sup>, E Fu <sup>a,b,c</sup>, Yalou Sun <sup>a,b,c</sup>, Jipeng Wang <sup>a,b,c</sup>, Li Chen  
8 <sup>a</sup>, Xiaoyu Hu <sup>a,b,c</sup>, Jun Wang <sup>a,b,c</sup>, Zhaohui Hu <sup>a,b,c</sup>, Wenjing Shi <sup>a,b,c</sup>, Zhi Cao <sup>a,b,c</sup>, Yiqiang  
9 Zhong <sup>a,b,c</sup>, Changchun Wang <sup>a,b,c</sup>, Lulu Hu <sup>a,b,c\*</sup>

10

11 <sup>a</sup> The 404 Company Limited, China National Nuclear Corporation, Jiayuguan 735100,  
12 China.

13 <sup>b</sup> Key Laboratory of Nuclear Fuel Cycle Technology, The 404 Company Limited, China  
14 National Nuclear Corporation, Lanzhou 735100, China.

15 <sup>c</sup> Chengdu Nuclear Engineering Design & Research Institute Co., Ltd., 404., CNNC,  
16 Chengdu, 610000, China.

17 \* Corresponding author: E-mail: [hucun402@163.com](mailto:hucun402@163.com) (C. Hu), [L\\_L\\_Hu@163.com](mailto:L_L_Hu@163.com) (LL  
18 Hu)

19

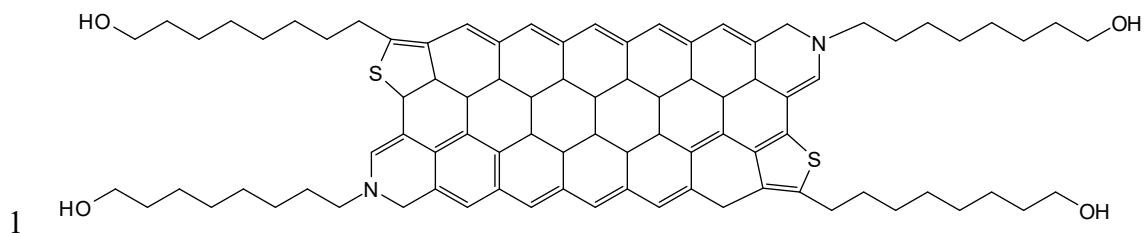

2 **Figure S1:** 2D structural diagram of the asphaltene molecular model.

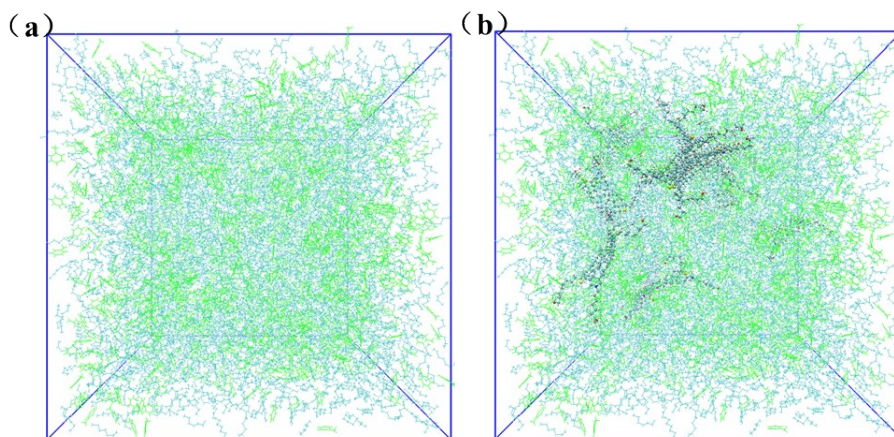

4 **Figure S2:** Simulation system: (a)70% n-heptane + 30% toluene system; (b) 70% n-  
 5 heptane + 30% toluene + asphaltene system (n-Heptane molecules are shown in cyan,  
 6 toluene molecules in green, and ASP1 molecules in a ball-and-stick model).

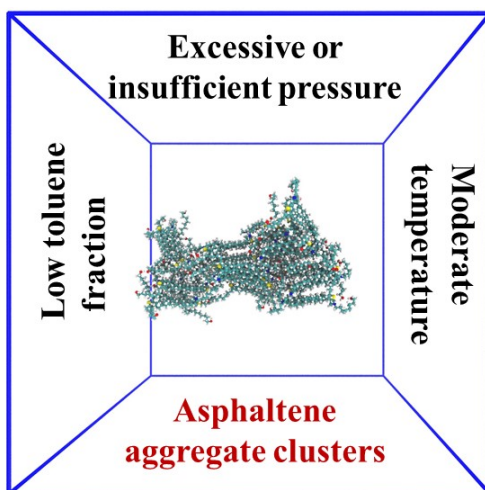

8 **Figure S3:** Stacked asphaltene structures and their behavior in solvents.

9

10

1 **Table S1.** The composition and dimensions of different solvent simulation systems (P  
 2 =1 bar (0.1 MPa), T = 60°C (333 K)).

| Toluene mass fraction | Number of n-heptane molecules | Number of toluene molecules | Number of asphaltene molecules | Initial dimension of the system model | Final dimension of the system model |
|-----------------------|-------------------------------|-----------------------------|--------------------------------|---------------------------------------|-------------------------------------|
| 10%                   | 4590                          | 555                         | 22                             | 12.0 nm × 12.0 nm × 12.0 nm           | 10.96 nm × 10.97 nm × 10.96 nm      |
| 20%                   | 4080                          | 1110                        | 22                             | 12.0 nm × 12.0 nm × 12.0 nm           | 10.87 nm × 10.87 nm × 10.87 nm      |
| 30%                   | 3580                          | 1630                        | 22                             | 12.0 nm × 12.0 nm × 12.0 nm           | 10.78 nm × 10.77 nm × 10.77 nm      |
| 40%                   | 3054                          | 2224                        | 22                             | 12.0 nm × 12.0 nm × 12.0 nm           | 10.68 nm × 10.67 nm × 10.67 nm      |
| 50%                   | 2550                          | 2772                        | 22                             | 12.0 nm × 12.0 nm × 12.0 nm           | 10.56 nm × 10.57 nm × 10.56 nm      |

1 **Table S2.** The composition and dimensions of simulation systems at different  
 2 temperatures (P =1 bar (0.1 MPa), 30% toluene).

| Temperature    | Number of n-heptane molecules | Number of toluene molecules | Number of asphaltene molecules | Initial dimension of the system model | Final dimension of the system model |
|----------------|-------------------------------|-----------------------------|--------------------------------|---------------------------------------|-------------------------------------|
| 30°C<br>(303K) | 3580                          | 1630                        | 22                             | 12.0 nm<br>×12.0 nm<br>×12.0 nm       | 10.61 nm<br>×10.61 nm<br>×10.61 nm  |
| 40°C<br>(313K) | 3580                          | 1630                        | 22                             | 12.0 nm<br>×12.0 nm<br>×12.0 nm       | 10.66 nm<br>×10.66 nm<br>×10.66 nm  |
| 50°C<br>(323K) | 3580                          | 1630                        | 22                             | 12.0 nm<br>×12.0 nm<br>×12.0 nm       | 10.71 nm<br>×10.71 nm<br>×10.71 nm  |
| 60°C<br>(333K) | 3580                          | 1630                        | 22                             | 12.0 nm<br>×12.0 nm<br>×12.0 nm       | 10.78 nm<br>×10.77 nm<br>×10.77 nm  |
| 70°C<br>(343K) | 3580                          | 1630                        | 22                             | 12.0 nm<br>×12.0 nm<br>×12.0 nm       | 10.82 nm<br>×10.81 nm<br>×10.82 nm  |
| 80°C<br>(353K) | 3580                          | 1630                        | 22                             | 12.0 nm<br>×12.0 nm<br>×12.0 nm       | 10.89 nm<br>×10.89 nm<br>×10.89 nm  |
| 90°C<br>(363K) | 3580                          | 1630                        | 22                             | 12.0 nm<br>×12.0 nm<br>×12.0 nm       | 10.92 nm<br>×10.91 nm<br>×10.91 nm  |

1 **Table S3.** The composition and dimensions of simulation systems at different pressures  
 2 (T = 60 °C (333 K), 30% toluene).

| Pressure          | Number of n-heptane molecules | Number of toluene molecules | Number of asphaltene molecules | Initial dimension of the system model | Final dimension of the system model |
|-------------------|-------------------------------|-----------------------------|--------------------------------|---------------------------------------|-------------------------------------|
| 0.1MPa<br>(1bar)  | 3580                          | 1630                        | 22                             | 12.0 nm × 12.0 nm × 12.0 nm           | 10.78 nm × 10.77 nm × 10.77 nm      |
| 0.5MPa<br>(5bar)  | 3580                          | 1630                        | 22                             | 12.0 nm × 12.0 nm × 12.0 nm           | 10.76 nm × 10.76 nm × 10.76 nm      |
| 1MPa<br>(10bar)   | 3580                          | 1630                        | 22                             | 12.0 nm × 12.0 nm × 12.0 nm           | 10.75 nm × 10.75 nm × 10.75 nm      |
| 2MPa<br>(20bar)   | 3580                          | 1630                        | 22                             | 12.0 nm × 12.0 nm × 12.0 nm           | 10.74 nm × 10.74 nm × 10.74 nm      |
| 5MPa<br>(50bar)   | 3580                          | 1630                        | 22                             | 12.0 nm × 12.0 nm × 12.0 nm           | 10.73 nm × 10.73 nm × 10.73 nm      |
| 8MPa<br>(80bar)   | 3580                          | 1630                        | 22                             | 12.0 nm × 12.0 nm × 12.0 nm           | 10.71 nm × 10.71 nm × 10.71 nm      |
| 10MPa<br>(100bar) | 3580                          | 1630                        | 22                             | 12.0 nm × 12.0 nm × 12.0 nm           | 10.72 nm × 10.72 nm × 10.72 nm      |
